# Supplementary material for: Ultrastructural and SINS analysis of the cell wall integrity response ofAspergillus nidulansto the absence of galactofuranose
Source: Royal Society of Chemistry journal article supplement (doi:10.1039/c8an01591k), 2018-11-01
Supplement: c8an01591k1.pdf [file c8an01591k1.pdf]

Electronic Supplementary Information Figure 1.

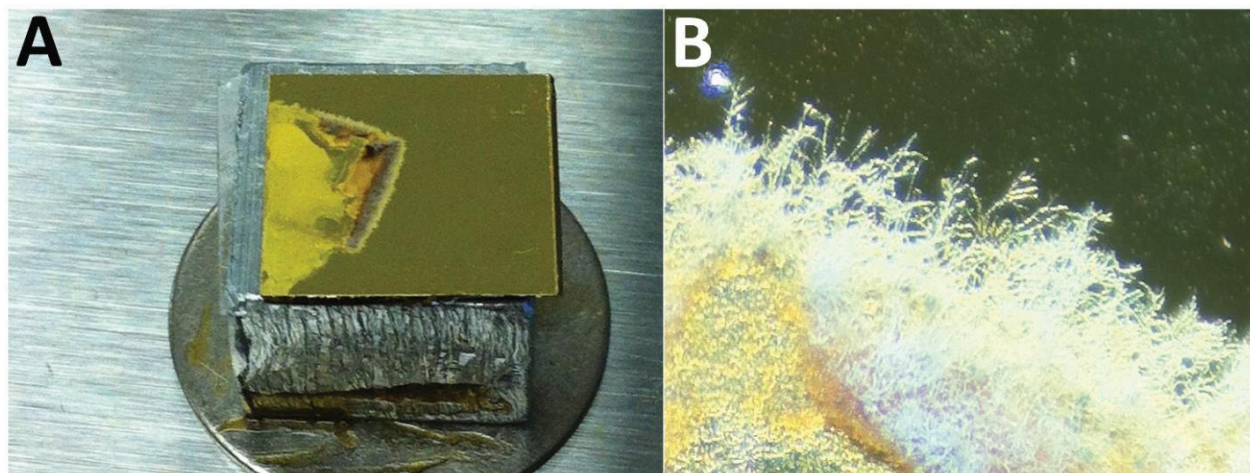

**ESI Fig. 1.** Sample preparation for SINS experiment. **A.** Gold-coated silicon wafer ( $\sim 1 \text{ cm}^2$ ) with dried fungal hyphae preparation (*ugmA $\Delta$* ) is taped to metal chuck for mounting in the AFM-SINS sample chamber. The hyphae grew out across the pristine gold surface, from the 3 mm PDA block. The dried PDA block was removed, but the outline remains. Hyphae at the centre are the best positioned for data acquisition. **B.** Photo of the hyphae emerging from the PDA region. More detailed images are given in the manuscript.
